# Supplementary material for: Porous PEDOT:PSS smart thermal insulators enabling energy harvesting and detection
Source: Royal Society of Chemistry journal article supplement (doi:10.1039/d4ta00287c), 2024-01-01
Supplement: d4ta00287c1.pdf [file d4ta00287c1.pdf]

## **Supporting Information**

### **Porous PEDOT:PSS Smart Thermal Insulators Enabling Energy Harvesting and Detecting**

Jeong-Seob Yun, and Sang Hyuk Im\*

Department of Chemical and Biological Engineering, Korea University, 145 Anam-ro,  
Seongbuk-gu, Seoul 136-713, Republic of Korea.

\*Correspondence to : [imromy@korea.ac.kr](mailto:imromy@korea.ac.kr)(S. H. I)

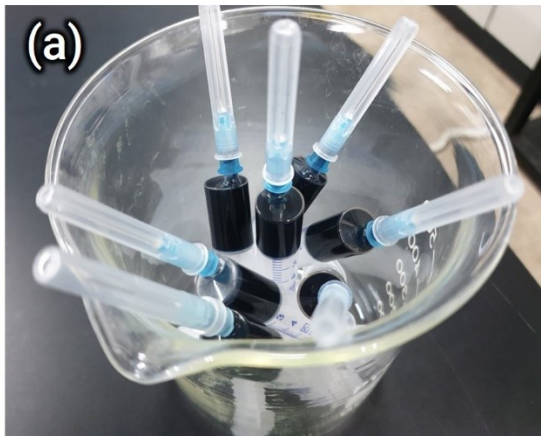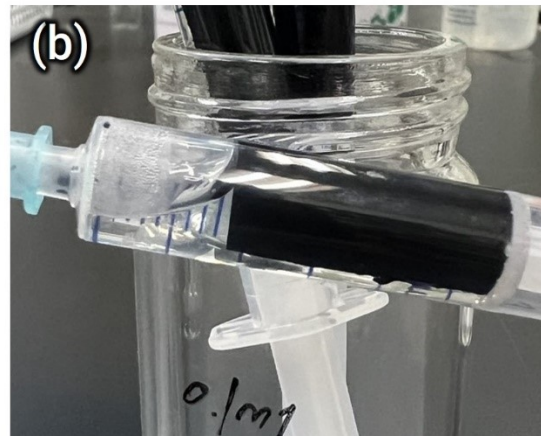

**Figure S1.** (A) Image of PEDOT:PSS/MgSO<sub>4</sub>/EtOH mixture filled into polypropylene syringe being used as a mold for hydrogel formation. (B) Image of PEDOT:PSS hydrogel suspended inside solvent after complete cross-linking via heat treatment.

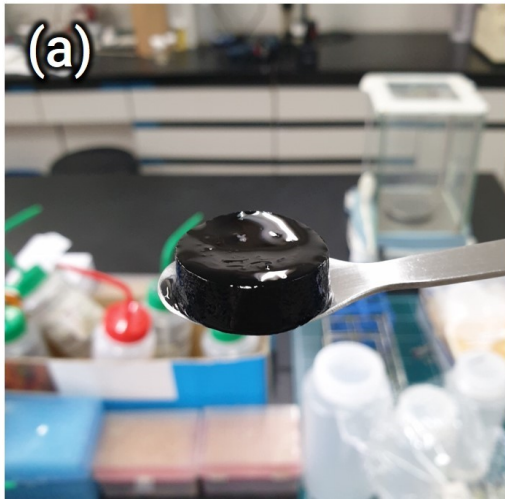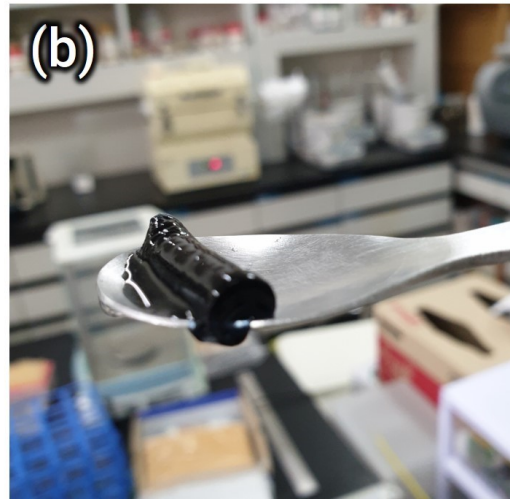

**Figure S2.** Image of PEDOT:PSS hydrogel retrieved after heat treatment which was formed inside (A) wide mouth cylindrical jar, and (B) 3ml polypropylene syringe.

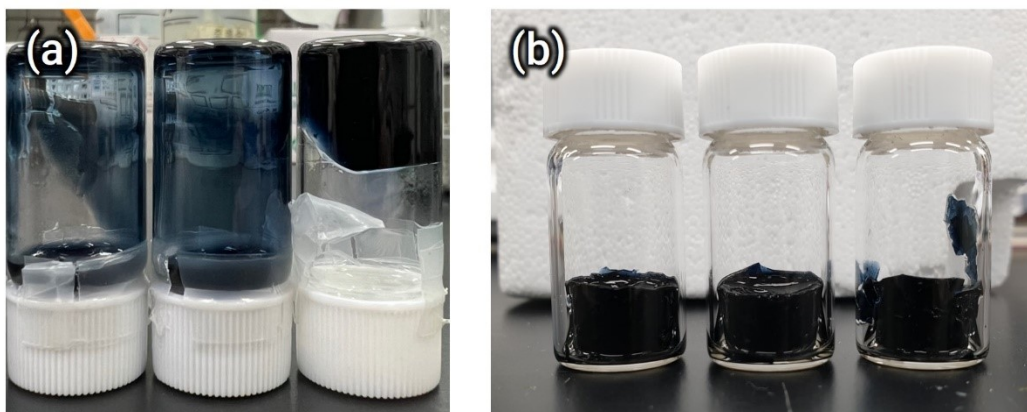

**Figure S3.** Image of PEDOT:PSS solution after heat treatment. (A) Samples in which 10wt%, 20wt%, 30wt% EtOH was added (respectively, from left to right), without  $\text{MgSO}_4$  addition. (B) Sample in which 10wt%, 20wt%, 30wt% EtOH was added (respectively, from left to right), where  $\text{MgSO}_4$  was added as cross-linking agent.

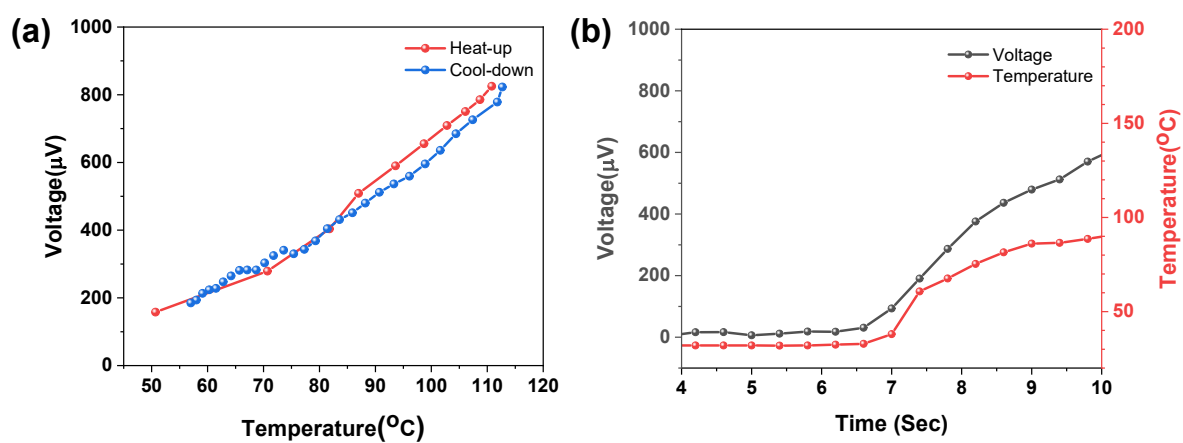

**Figure S4.** (A) Voltage-temperature plot of a typical response cycle by heating and subsequent cooling of porous PEDOT:PSS. (B) Magnified voltage-time plot showing response time of porous PEDOT:PSS for temperature detection.

**Table S1.** Component analysis of PEDOT:PSS/0.5M MgSO<sub>4</sub>/EtOH viscous mixture

| Component              | Solution Volume [mL] | Solid component             | Solid content [g]    | Solid density [g cm <sup>-3</sup> ] | Solid Volume [mL]       |
|------------------------|----------------------|-----------------------------|----------------------|-------------------------------------|-------------------------|
| PEDOT:PSS solution     | 1                    | PEDOT:PSS                   | 0.013                | 1.06 <sup>a</sup>                   | 0.01378                 |
| 0.5M MgSO <sub>4</sub> | 0.0648               | MgSO <sub>4</sub>           | 1 x 10 <sup>-4</sup> | 2.66 <sup>b</sup>                   | 2.66 x 10 <sup>-4</sup> |
| EtOH                   | 0.1408               | -                           | -                    | -                                   | -                       |
| Total                  | 1.2056               | PEDOT:PSS/MgSO <sub>4</sub> | 0.0131               | -                                   | 0.01405                 |

<sup>a</sup>Provided by the manufacturer; <sup>b</sup>Density of MgSO<sub>4</sub> acquired from literature. <sup>1</sup>

**Table S2.** Porosity calculation of PU foam, porous PEDOT:PSS and upper limit estimation

| Sample                             | Bulk weight [g] | Bulk volume [cm <sup>3</sup> ]                                      | Solid density [g cm <sup>-3</sup> ] | Bulk density [g cm <sup>-3</sup> ] | Solid Volume [cm <sup>3</sup> ] | Porosity                          |
|------------------------------------|-----------------|---------------------------------------------------------------------|-------------------------------------|------------------------------------|---------------------------------|-----------------------------------|
| PU foam                            | 0.0895          | 1.98                                                                | 1.05 <sup>b</sup>                   | 0.0452                             | -                               | 0.9570                            |
| porous PEDOT:PSS                   | 0.0492          | 0.9604                                                              | 1.06 <sup>c</sup>                   | 0.051226                           | -                               | 0.9517                            |
| porous PEDOT:PSS with no shrinkage | -               | 1.2056 <sup>a</sup><br>( $V_{\text{bulk}} \approx V_{\text{tot}}$ ) | -                                   | -                                  | 0.01405 <sup>a</sup>            | 0.9883<br>(Estimated upper limit) |

<sup>a</sup>Values acquired from Table S1; <sup>b</sup>Density of polyurethane acquired from literature<sup>2</sup>;

<sup>c</sup>Provided by the manufacturer.

**Table S3.** Recent studies of porous TE carbon materials in comparison with this work

| P-type TE                               | N-type TE        | Thermal conductivity<br>[W m <sup>-1</sup> K <sup>-1</sup> ] | TE power density<br>[nW cm <sup>-2</sup> ] | Thermal gradient <sup>b</sup><br>[K]                              | Ref.      |
|-----------------------------------------|------------------|--------------------------------------------------------------|--------------------------------------------|-------------------------------------------------------------------|-----------|
| PEDOT:PSS/<br>ZnO<br>composite          | N/A              | 0.053                                                        | 0.86                                       | Forced<br>gradient<br>$\Delta T = 50$ K                           | 3         |
| SEBS-<br>PEDOT:PSS-<br>melamine<br>foam | N/A              | $\sim 0.066$                                                 | 16.1                                       | Forced<br>gradient<br>$\Delta T = 20$ K                           | 4         |
| PEDOT-<br>TOS/SWCN<br>T aerogel         | N/A              | $\sim 0.145$<br>( $\sim 0.09$ ) <sup>a</sup>                 | 3073<br>(312) <sup>a</sup>                 | Forced<br>gradient<br>$\Delta T = 50$ K<br>( $\Delta T = 20$ K)   | 5         |
| CNT foam                                | CNT foam         | 0.17                                                         | 390.6                                      | Stabilized<br>gradient with<br>fan cooling<br>$\Delta T = 13.9$ K | 6         |
| CNT/PDMS<br>foam                        | CNT/PDMS<br>foam | 0.13                                                         | 494.8                                      | Stabilized<br>gradient with<br>fan cooling<br>$\Delta T = 18.1$ K | 7         |
| Mesoporous<br>fibrillar<br>PEDOT:PSS    | N/A              | 0.065                                                        | 251.0 <sup>c</sup>                         | Forced<br>gradient<br>$\Delta T = 15.16$ K                        | 8         |
| PEDOT:PSS<br>aerogel                    | N/A              | 0.0526                                                       | 90.2                                       | Stabilized<br>gradient<br>$\Delta T = 15.16$ K                    | This work |

<sup>a</sup>Determined based on provided power plots at  $\Delta T = 20$  K; <sup>b</sup>Forced gradient refers to a setup in which thermal source is directly applied on both sides, stabilized gradient refers to a setup in which thermal source is applied only to one side and thermal equilibrium was reached.;

<sup>c</sup>Determined based on provided power plots at  $\Delta T = 15.16$  K

### Supporting references

1. S. S. Chadwick, *Ref. Serv. Rev.*, 1988, **16**, 31-34.
2. D. W. Van Krevelen and K. Te Nijenhuis, *Properties of polymers: their correlation with chemical structure; their numerical estimation and prediction from additive group contributions*, Elsevier, 2009.
3. W. Lee, S. Lee, H. Kim and Y. Kim, *Chem. Eng. J.*, 2021, **415**, 128935.
4. J. Oh, J.-H. Kim, K. T. Park, K. Jo, J.-C. Lee, H. Kim and J. G. Son, *Nanoscale*, 2018, **10**, 18370-18377.
5. X. Wang, L. Liang, H. Lv, Y. Zhang and G. Chen, *Nano Energy*, 2021, **90**, 106577.
6. M.-H. Lee, Y. H. Kang, J. Kim, Y. K. Lee and S. Y. Cho, *Adv. Energy Mater.*, 2019, **9**, 1900914.
7. Y. H. Kang, E. J. Bae, M.-H. Lee, M. Han, B. J. Kim and S. Y. Cho, *Small*, 2022, **18**, 2106108.
8. Q. Weinbach, S. V. Thakkar, A. Carvalho, G. Chaplais, J. Combet, D. Constantin, N. Stein, D. Collin and L. Biniek, *Front. Electron. Mater.*, 2022, **2**.
